# Supplementary material for: The genetic architecture of constitutive and induced trichome density in two new recombinant inbred line populations of Arabidopsis thaliana: phenotypic plasticity, epistasis, and bidirectional leaf damage response
Source: PubMed Central journal article supplement (PMC4108038; doi:10.1186/1471-2229-14-119), 2014-05-05
Supplement: 1471-2229-14-119-S1.pdf [file 1471-2229-14-119-S1.pdf]

**Additional File 1.** Details for microsatellite markers used to generate linkage maps for Hi-0 x Ob-0 and St-0 x Sf-2 RILs

| Marker            | Chromosome | Physical Position (bp) | HO                  |                | SS                  |                | Source     | Forward primer                | Reverse primer             |
|-------------------|------------|------------------------|---------------------|----------------|---------------------|----------------|------------|-------------------------------|----------------------------|
|                   |            |                        | Map position (cM)   | Significant SD | Map position (cM)   | Significant SD |            |                               |                            |
| <b>M100008</b>    | 1          | 8639                   | 0                   | **             |                     |                | VAST       | CCACGCATCTGTGTTCACTC          | GCAAAAGTGGGCCTAACAAA       |
| <b>F19P19</b>     | 1          | 1157727                | 2.598               | ***            | 0 <sup>+</sup>      | *****          | VAST       | CCACGTAGGTCAAGAAGAAGAAG       | TGCTGCTGCGATAGAGAGAG       |
| <b>T1G11</b>      | 1          | 1243352                |                     |                | 0.424 <sup>+</sup>  | *****          | VAST       | GAAGACAAAGCTCTGCAGTAATG       | AATTGCATAAGGCACTTGAAAG     |
| <b>F21M12</b>     | 1          | 3212191                | 6.784               | **             | 5.105               | *****          | VAST       | GGCTTTCTCGAAATCTGTCC          | TTACTTTTTGCCTTTGTCTATTG    |
| <b>ICE10</b>      | 1          | 4015381                | 10.47               | **             |                     |                | VAST       | AACATCCACAAGTTTCTAAAACAATC    | GACTCTTATGGGTAAGCTCCTTG    |
| <b>MS1-2538</b>   | 1          | 6165662                |                     |                | 13.956              | *****          | VAST       | TGGGTTTTTAATGGCGTTTG          | CCGCGACTTATGCTTACC         |
| <b>MSAT1.10</b>   | 1          | 7296649                | 22.834              | -              |                     |                | VAST       | ATGGTGAGATACTGAGATTAT         | CGAGAAGGTCTAAAGGTA         |
| <b>MSAT1.3</b>    | 1          | 8322175                | 29.082              | *****          | 28.392              | ****           | VAST       | GGAAGTGTGTCTGGGTAAG           | CGATTGCACTAAAAGCTCTC       |
| <b>CIW12</b>      | 1          | 9621344                |                     |                | 36.254              | *****          | VAST       | AGGTTTTATTGCTTTTCACA          | CTTTCAAAAGCACATCACA        |
| <b>VMS1.10</b>    | 1          | 10                     | 40.157              | -              |                     |                | This paper | ACCAACTCGGATTCGCTCG           | TTTGCTGGCGATATGAGTCACTTG   |
| <b>MS1-5284</b>   | 1          | 12511232               | 54.917              | -              |                     |                | EuMicrosat | CCTGAAAACCCCGTTAAAG           | CGGGACCTTTGTGTGATATTC      |
| <b>MSAT1.4</b>    | 1          | 14160180               | 63.02 <sup>+</sup>  | -              |                     |                | VAST       | CTAACTAGAACCAGGGGTAA          | ACAAAATCGTGGTGATAATA       |
| <b>T27K12</b>     | 1          | 15926702               | 64.389 <sup>+</sup> | -              | 54.593              | *****          | VAST       | GGAGGCTATACGAATCTTGACA        | GGACAACGTCTCAAACGGTT       |
| <b>MSAT1.42</b>   | 1          | 18153083               | 74.759              | -              | 65.695              | *****          | VAST       | TAACAAAATTGCACCC              | ACAAATAAAATTGAATATCAG      |
| <b>NGA128</b>     | 1          | 20633251               | 87.511              | -              | 76.226              | *****          | VAST       | GGTCTGTTGATGTCGTAAGTCG        | ATCTTGAAACCTTTAGGGAGGG     |
| <b>F5I14</b>      | 1          | 24374008               |                     |                | 87.92               | *****          | VAST       | CTGCCTGAAATTGTCGAAAC          | GGCATCACAGTTCTGATTCC       |
| <b>MSAT1.12</b>   | 1          | 25686587               |                     |                | 93.066              | *****          | VAST       | TTAGAGATTCCGCAACCTC           | CGTGTGCCCAACCA             |
| <b>MSAT1.13</b>   | 1          | 25827433               |                     |                | 96.928              | *****          | VAST       | CAACCACCAGGCTC                | GTCAAACCAGTTCAATCA         |
| <b>MSAT1.1</b>    | 1          | 26398711               | 106.553             | -              | 98.67               | *****          | VAST       | ATACGATAAGATTATTAGCA          | CCCATGCTTTTTTGTGAAA        |
| <b>F22K20</b>     | 1          | 28895040               | 116.332             | -              | 104.549             | *****          | VAST       | TTTTTGGTGAGATTTAAGCCC         | ATATCTCCATCGCTGCAACC       |
| <b>MSAT1.5</b>    | 1          | 29016886               |                     |                | 104.557             | *****          | VAST       | GCATCGCTCTTAAACAACCAT         | CGTTGCAAACCGTATCAGAA       |
| <b>F5I6M</b>      | 1          | 30192367               |                     |                | 109.661             | *****          | VAST       | GACCCTAGAGGCAAACCAATG         | AGTGAGTAAATGGTGGGGAATCG    |
| <b>MSAT2.5</b>    | 2          | 208178                 |                     |                | 0                   | *              | VAST       | TGAGAGGGACAGATAGGAA           | ATCAAAGGGATACTGACAA        |
| <b>MSAT200897</b> | 2          | 897197                 | 0                   | -              | 10.632              | **             | VAST       | AAAAATTTAACCCTGTTGTAGCA       | AGAAGTCGGTGGATGAGCAC       |
| <b>MSAT2.38</b>   | 2          | 2457014                |                     |                | 19.183 <sup>+</sup> | ****           | VAST       | TGTAACGCTAATTTAATTGG          | CGCTCTTTCGCTCTG            |
| <b>MSAT2.18</b>   | 2          | 2799644                | 8.528               | -              | 19.819 <sup>+</sup> | ****           | VAST       | TAGTCTTTTTGGTGCGCATA          | AGCCTCTCCAAGCTTAGGTCT      |
| <b>IND628</b>     | 2          | 6280231                |                     |                | 23.184 <sup>+</sup> | ****           | VAST       | AATTTAAGAAAGAACAATTTTGAG<br>A | CCATTTCAAGCTCTTACACTTCTACA |
| <b>MSAT2.28</b>   | 2          | 6409845                |                     |                | 24.096 <sup>+</sup> | -              | VAST       | AATAGAAATGGAGTTCGACG          | TGAACTTGTGTGAGCTTTG        |
| <b>MSAT2.11</b>   | 2          | 8227826                | 24.945              | *              |                     |                | VAST       | GATTTAAAAGTCCGACCTA           | CAAAGAGTTGTGCAA            |
| <b>PLS7</b>       | 2          | 9813750                | 29.735              | -              |                     |                | VAST       | GATGAATCTTCTCGTCCAAAAT        | GACAAACTAAACAACATCTTCTT    |

|                   |   |          |        |       |        |       |            |                        |                          |
|-------------------|---|----------|--------|-------|--------|-------|------------|------------------------|--------------------------|
| <b>MSAT2.31</b>   | 2 | 10778033 | 33.798 | -     |        |       | VAST       | GCTCCTCTTTGCCGCTAG     | GCGATTTCATCTTGTGCATC     |
| <b>MSAT2.41</b>   | 2 | 11095452 |        |       | 42.648 | **    | VAST       | GACTGTTTCATCGGATCCAT   | ACAAACCATTGTTGGTCGTG     |
| <b>MSAT2.7</b>    | 2 | 13192607 | 47.843 | -     |        |       | VAST       | CTCAAATCAAGAACGCTGAC   | CCCGATATAGACAACGACAA     |
| <b>MSAT2.4</b>    | 2 | 13831870 |        |       | 54.808 | ***** | VAST       | TGGGTTTTTGTGGGTC       | GTATTATTGTGCTGCCTTTT     |
| <b>IND216199</b>  | 2 | 16199330 | 55.207 | -     |        |       | VAST       | TGGCTCATTTCACTCACAGG   | GGCTATCTATGGCCGTTATGA    |
| <b>MSAT2.22</b>   | 2 | 19632943 | 69.455 | -     | 75.988 | **    | VAST       | CGATCCAATCGGTCTCTCT    | TGGTAACATCCCGAACTTC      |
| <b>MSAT3.99</b>   | 3 | 1514825  | 0      | -     | 0      | ***** | VAST       | CCAACAAGAACAAGACATT    | AGTGAAATCTGAAGCGATA      |
| <b>ATHCHIB2</b>   | 3 | 3963391  | 11.193 | -     | 3.039  | ***** | VAST       | GGATCCAAGTGCTCATATATAC | CTTTCGTTTCTAAATATGAGAAGC |
| <b>NT204</b>      | 3 | 5570082  | 17.117 | -     |        |       | VAST       | TGGAAGCTCTAGAAACGATCG  | ACCACCTAAACCGAGAATTGG    |
| <b>MSAT305754</b> | 3 | 5754608  |        |       | 7.814  | ***** | VAST       | AGAAGAAGCGCACATGTTTTT  | AAAATTGTACGTTTGATTGTTGAA |
| <b>MSAT3.4</b>    | 3 | 7672410  | 23.793 | -     | 17.718 | **    | VAST       | TGTAACATTGCATTTTATG    | CCTCTTCGGTCTATATGACT     |
| <b>MSAT3.6</b>    | 3 | 8467190  |        |       | 25.118 | ***   | VAST       | CTACTTTACGCCTTTTATTG   | TGAATTGTCCCGAGAC         |
| <b>MSAT3.19</b>   | 3 | 8808167  | 36.21  | -     | 29.328 | -     | VAST       | TAATTCGATCCAATTGACAT   | TGGCTTGGCACAAC           |
| <b>MSAT3.2</b>    | 3 | 9055511  |        |       | 30.85  | -     | VAST       | AAGGTACGGCGGTGGATATTG  | CGGGGATTTCTTCTCTGTG      |
| <b>MSAT3.117</b>  | 3 | 9860185  | 41.648 | -     | 38.296 | **    | VAST       | CCCGTTTAGAAATATGTGT    | CGTCATACCATTTTATCAG      |
| <b>MSAT3.8</b>    | 3 | 11002949 | 49.586 | -     |        |       | VAST       | ATGTTAAAAACCCGTGTTGG   | TTTAACCTTATCCGGGAAAG     |
| <b>MSAT3.31</b>   | 3 | 11037360 |        |       | 48.772 | **    | VAST       | CTCTTTTTCTTATGCCAA     | AGAGTGGGTTGATACCAT       |
| <b>MSAT3.32</b>   | 3 | 11208231 |        |       | 52.728 | ***** | VAST       | GCACCTGCAGCTTAACTT     | CGTGACTGTCAAACCG         |
| <b>MS3-5962</b>   | 3 | 15392985 | 53.817 | -     |        |       | EuMicrosat | CACGTGCGAACGACTACAAC   | GCTCCAAAACGGAACCTAC      |
| <b>VMS3.17</b>    | 3 | 17       | 63.063 | -     |        |       | This paper | GCCGGGTACAAGCCAGAAAAG  | ACCGGTGAGGAATGGCCAGC     |
| <b>MSAT3.65</b>   | 3 | 19835420 | 86.335 | -     | 74.988 | -     | VAST       | CCAACTCTTCTTCAAACA     | TCTCTTAGCAAACGAATGTC     |
| <b>CDC2BG</b>     | 3 | 20070710 |        |       | 77.153 | *     | VAST       | GGGAAAAACGAAGTGACGTG   | ATTGAACTGTGTTGGTTTCTGG   |
| <b>MSAT3.13</b>   | 3 | 21377089 |        |       | 84.888 | -     | VAST       | TTGTGTGTTTGCATC        | CATATCCGTTTTTATGTTTT     |
| <b>NGA6</b>       | 3 | 23042025 |        |       | 90.284 | **    | VAST       | TGGATTTCTTCTCTCTCAC    | ATGGAGAAGCTTACTACTGATC   |
| <b>MSAT3.70</b>   | 3 | 23449179 |        |       | 91.296 | ***   | VAST       | CACCCATAGACACACAACC    | TCAAAACCTCCAACCATAC      |
| <b>MSAT4.41</b>   | 4 | 42208    | 0      | ***** | 0†     | -     | VAST       | CCTACACTCATCAGATTCAG   | TAATTAGGGTTTGATCATTC     |
| <b>MSAT4.39</b>   | 4 | 89498    |        |       | 0.739† | -     | VAST       | GTTATCACATTAATAATCACC  | CCAATTGTAATATATGAACA     |
| <b>MSAT4.43</b>   | 4 | 2575724  | 11.23  | ***** | 10.854 | -     | VAST       | GCATTGGACCATAAGGG      | TCAAGACGGTTTCAAGTTG      |
| <b>ATHDET1</b>    | 4 | 6346349  | 19.741 | ***** | 29.233 | ***** | VAST       | TTCAAACACCAATATCAGGCC  | GGTGAAATGGAGGAGACGA      |
| <b>MSAT4.35</b>   | 4 | 7549254  | 28.94  | ****  | 33.361 | ***** | VAST       | CCCATGTCTCCGATGA       | GGCGTTTAATTTGCATTCT      |
| <b>MSAT4.15</b>   | 4 | 9362588  | 41.419 | -     | 40.877 | ****  | VAST       | TTTCTTGTCTTTCCCTGAA    | GACGAAGAAGGAGACGAAAA     |
| <b>CIW7</b>       | 4 | 11524362 | 55.634 | *     | 56.022 | **    | VAST       | AATTTGGAGATTAGCTGGAAT  | CCATGTTGATGATAAGCACAA    |
| <b>MS4-5228</b>   | 4 | 13421331 |        |       | 64.347 | -     | EuMicrosat | GCTCCTCGAGAAAAGAACG    | TCTCACATCACGGGACAATC     |
| <b>MSAT4.14</b>   | 4 | 15212515 | 72.547 | **    | 70.668 | **    | VAST       | GACCGTTTCTAGTGCTACA    | ACGGAATAAGCGGAGGA        |
| <b>MSAT4.12</b>   | 4 | 15960078 | 73.708 | *     |        |       | VAST       | AAAGGAAGAAGAAGACTGTT   | AGAAGAAGAAGCGAGATT       |

|                   |   |          |         |       |         |       |            |                          |                          |
|-------------------|---|----------|---------|-------|---------|-------|------------|--------------------------|--------------------------|
| <b>MSAT4.68</b>   | 4 | 17261718 | 79.464  | **    | 80.69   | -     | VAST       | GGTCTCTTTTTCCCTAAC       | CATTGTCCATCATCAGAAC      |
| <b>MSAT4.38</b>   | 4 | 18412248 | 84.821  | *     | 88.353  | -     | VAST       | GCCTTATAGTACACCCAAA      | CCACTCCACTCTCGAA         |
| <b>MSAT4.31</b>   | 4 | 18573159 |         |       | 88.848  | -     | VAST       | AGGGATATGGATTGAGA        | GCCGTATAACTATTGGTT       |
| <b>MSAT500027</b> | 5 | 27394    |         |       | 0       | ***** | VAST       | AAAAGGAAGACAAAGCTTGACG   | AACCCACATGGCCTTATT       |
| <b>ATHCTR1A</b>   | 5 | 979763   | 0       | **    |         |       | VAST       | TATCAACAGAAACGCACCGAG    | CCACTTGTTTCTCTCTAG       |
| <b>NGA225</b>     | 5 | 1507104  | 1.475   | ***   | 8.504   | ***** | VAST       | GAAATCCAAATCCCAGAGAGG    | TCTCCCCACTAGTTTTGTGTCC   |
| <b>NGA151</b>     | 5 | 4669932  |         |       | 16.457  | ***** | VAST       | GTTTTGGGAAGTTTTGTCTGG    | CAGTCTAAAAGCGAGAGTATGATG |
| <b>NGA106</b>     | 5 | 5397351  | 12.377  | -     |         |       | VAST       | GTTATGGAGTTTCTAGGGCACG   | TGCCCATTTTTGTTCTTCTC     |
| <b>MSAT5.14</b>   | 5 | 7498509  | 25.871  | -     | 23.619  | ***** | VAST       | AACAACCTATCTTCTCTG       | TGTGACCCCTACTCAATA       |
| <b>NGA139</b>     | 5 | 8428136  | 31.946  | -     | 27.093  | ***** | VAST       | GGTTTCGTTTCACTATCCAGG    | AGAGCTACCAGATCCGATGG     |
| <b>MS5-4717</b>   | 5 | 10960119 | 54.19†  | **    |         |       | EuMicrosat | GCCAATCCGAGTAAATCGTG     | GGTGGACCGTTCCATTTTG      |
| <b>MSAT512110</b> | 5 | 12109959 | 54.759† | **    |         |       | VAST       | GATCTGATATACCTCGATTTTC   | TTTAATAAGCTTTTTCTCTACGC  |
| <b>MSAT5.1</b>    | 5 | 13924203 |         |       | 31.696  | ***** | VAST       | TCTAGCTTTATCCTTCTTTGA    | GCCTATTCCGAGATTCA        |
| <b>MSAT5.22</b>   | 5 | 13961058 | 60.913† | -     | 39.808  | ***** | VAST       | AGAACAAGTTAGGTGGCT       | GGGACAAGAATGGAGT         |
| <b>MSAT5.59</b>   | 5 | 15461361 |         |       | 51.898  | ***** | VAST       | CATAAGTCAGTTGATTCCA      | GCTAAAAGTAGAGCGAGAG      |
| <b>MSAT5.7</b>    | 5 | 17071433 | 79.241  | ***** |         |       | VAST       | GCTTGATACATTACCGGACA     | CCAAGCGTACTCGATCA        |
| <b>MSAT5.8</b>    | 5 | 17163228 |         |       | 57.879  | ***** | VAST       | GAAACATTTTCATGGGCTTT     | GAGAGCAGAGGCAAGTCA       |
| <b>MSAT518662</b> | 5 | 18662765 | 86.687  | ***** | 64.629  | ***** | VAST       | GCTCCAAAACCAACAGGTA      | TGGCCTCAAAGTACCCTTA      |
| <b>MSAT520037</b> | 5 | 20037472 |         |       | 71.238  | ***** | VAST       | CTTTCGGTGGATAAATCATGTTA  | CGCATACAAATTTTCTGCTATGT  |
| <b>JV6566</b>     | 5 | 22027830 |         |       | 82.103  | ***** | VAST       | TTTCTTTCACGGTTTCTAACTTTT | TCATCTTCCCTTAATTCTGATGA  |
| <b>JV6162</b>     | 5 | 22527623 | 110.994 | ***** |         |       | VAST       | CGCTTTCCTTGTGTCATTCC     | AAATGCAAATATTGATGTGTGAAA |
| <b>ICE4</b>       | 5 | 23837141 | 115.024 | ***** |         |       | VAST       | CACGAGGAATCTGGCATGGTCG   | AGCGATTGCAAGCGGCTCAAG    |
| <b>JV7576</b>     | 5 | 23879358 |         |       | 93.282  | **    | VAST       | CACAATCAGAGGGGGTTGAT     | AAATTTTGGGGGAAATGAAA     |
| <b>MSAT5.19</b>   | 5 | 25924795 | 122.18  | ***** | 98.609  | -     | VAST       | AACGCATTGCTGTTCCCA       | ATGGTTATCTCATCTGGTCT     |
| <b>K919</b>       | 5 | 26983961 |         |       | 112.624 | -     | VAST       | GATTCAGAGTTACGGTAACAG    | CTATTGACAGTAAAGAGTCG     |

SD: Segregation distortion; Significance levels - >0.1 \*<0.1 \*\*<0.05 \*\*\*<0.01 \*\*\*\*<0.005 \*\*\*\*\*<0.001

† Indicates markers constrained to match physical positions

VAST database <http://www.inra.fr/internet/Produits/vast/msat.php>

Eumicrosat database <http://www.veenuash.info/>
