# Supplementary material for: The genetic architecture of constitutive and induced trichome density in two new recombinant inbred line populations of Arabidopsis thaliana: phenotypic plasticity, epistasis, and bidirectional leaf damage response
Source: PubMed Central journal article supplement (PMC4108038; doi:10.1186/1471-2229-14-119), 2014-05-05
Supplement: 1471-2229-14-119-S3.pdf [file 1471-2229-14-119-S3.pdf]

**Additional File 3.** Candidate genes and associated AGI numbers for trichome density QTL.

| <b>QTL</b>       | <b>Candidate gene</b> | <b>AGI Number</b> |
|------------------|-----------------------|-------------------|
| HOC2, HOD1       | <i>ETC2</i>           | At2G30420         |
| HOC2, HOD1       | <i>TCL1</i>           | At2G30432         |
| HOC2, HOD1       | <i>TCL2</i>           | At2G30424         |
| HOC2, HOD1, SSC2 | <i>TTG2</i>           | At2G37260         |
| HOC2, HOD1, SSC2 | <i>URM9 (SAD2)</i>    | At2G31660         |
| HOD2             | <i>GL1</i>            | At3G27920         |
| HOD3, SSC4       | <i>TT8</i>            | At4G09820         |
| SSC1, SSD1       | <i>GL2</i>            | At1G79840         |
| SSC1, SSD1       | <i>At1G77670</i>      | At1G77670         |
| SSC1, SSD1       | <i>JAZ2</i>           | AT1G74950         |
| SSD1             | <i>RGL1</i>           | AT1G66350         |
| SSD1             | <i>JAZ9</i>           | AT1G70700         |
